# Supplementary material for: Distinct ventral tegmental area neuronal ensembles are indispensable for reward-driven approach and stress-driven avoidance behaviors
Source: Springer Nature journal article supplement (doi:10.1038/s41467-025-58384-3), 2025-04-02
Supplement: MOESM1 [file 41467_2025_58384_MOESM1_ESM.pdf]

**A**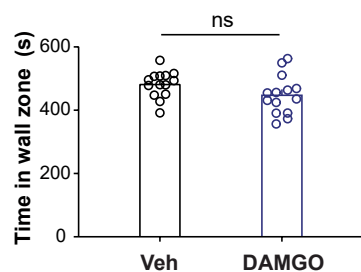**B**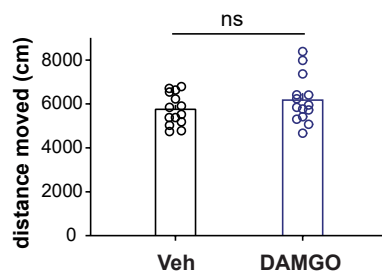**C**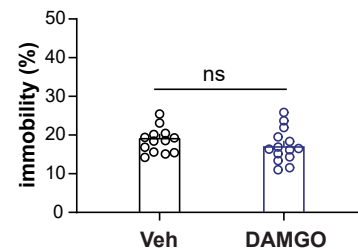**D**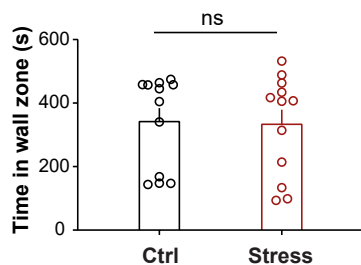**E**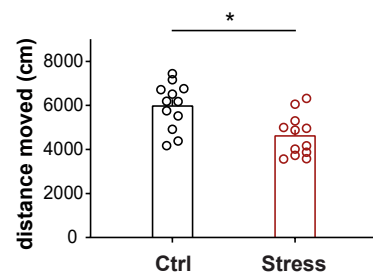**F**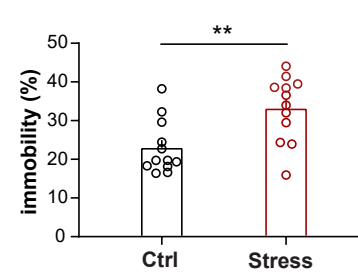**G**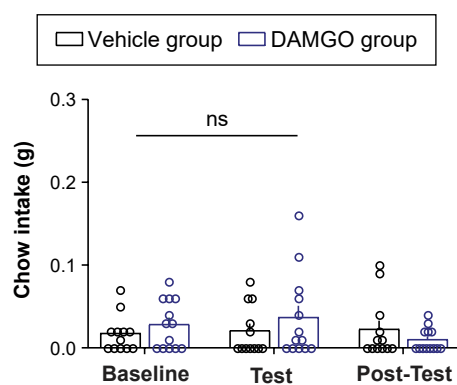**H**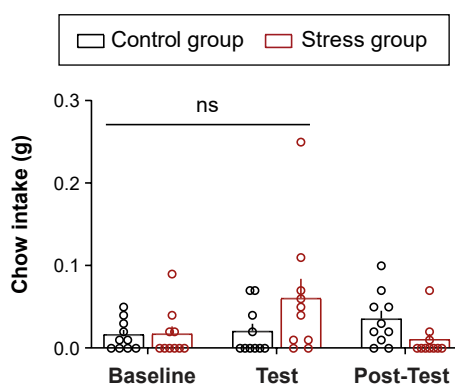

Supplementary Figure 1

**SUPPLEMENTARY FIGURE 1 | Effect of stimuli of opposite valence on approach/avoidance behavior and related measures. (A)** Amount of time spent in wall zone during the open field test after vehicle or DAMGO injection (N=14/group, unpaired t test,  $t(26)=1.699$ ,  $p=0.1012$ ). **(B)** Total distance moved during the open field test after vehicle or DAMGO injection (N=14/group, unpaired t test,  $t(26)=1.21$ ,  $p=0.2371$ ). **(C)** Proportion of time spent immobile during the open field test after vehicle or DAMGO injection (N=14/group, unpaired t test,  $t(26)=1.31$ ,  $p=0.2016$ ). **(D)** Amount of time spent in wall zone during the open field test after novel male C57BL/6J conspecific or acute stress exposure (N=12/group, unpaired t test,  $t(22)=0.1433$ ,  $p=0.8874$ ). **(E)** Total distance moved during the open field test after novel male C57BL/6J conspecific or social stress exposure (N=12/group, unpaired t test,  $t(22)=3.318$ ,  $p=0.0031$ ). **(F)** Proportion of time spent immobile during the open field test after novel male C57BL/6J conspecific or acute stress exposure (N=12/group, unpaired t test,  $t(22)=3.26$ ,  $p=0.0036$ ). **(G)** Amount of chow consumed during an 1-hour binge session after vehicle or DAMGO administration on test day ( $N_{veh}=12$ ,  $N_{DAMGO}=13$ , Two-way RM ANOVA, Day x Ligand interaction  $F(2,46)=1.604$ ,  $p=0.2122$ ). **(H)** Amount of chow consumed during an 1-hour binge session after novel male C57BL/6J conspecific or acute stress exposure (N=10/group, Two-way RM ANOVA, Day x Group interaction,  $F(2,36)=4.738$ ,  $p=0.0149$ , no significant post-hoc test). Data are presented as mean values + SEM. All statistical tests were performed two-sided. Source data are provided as a Source Data file.



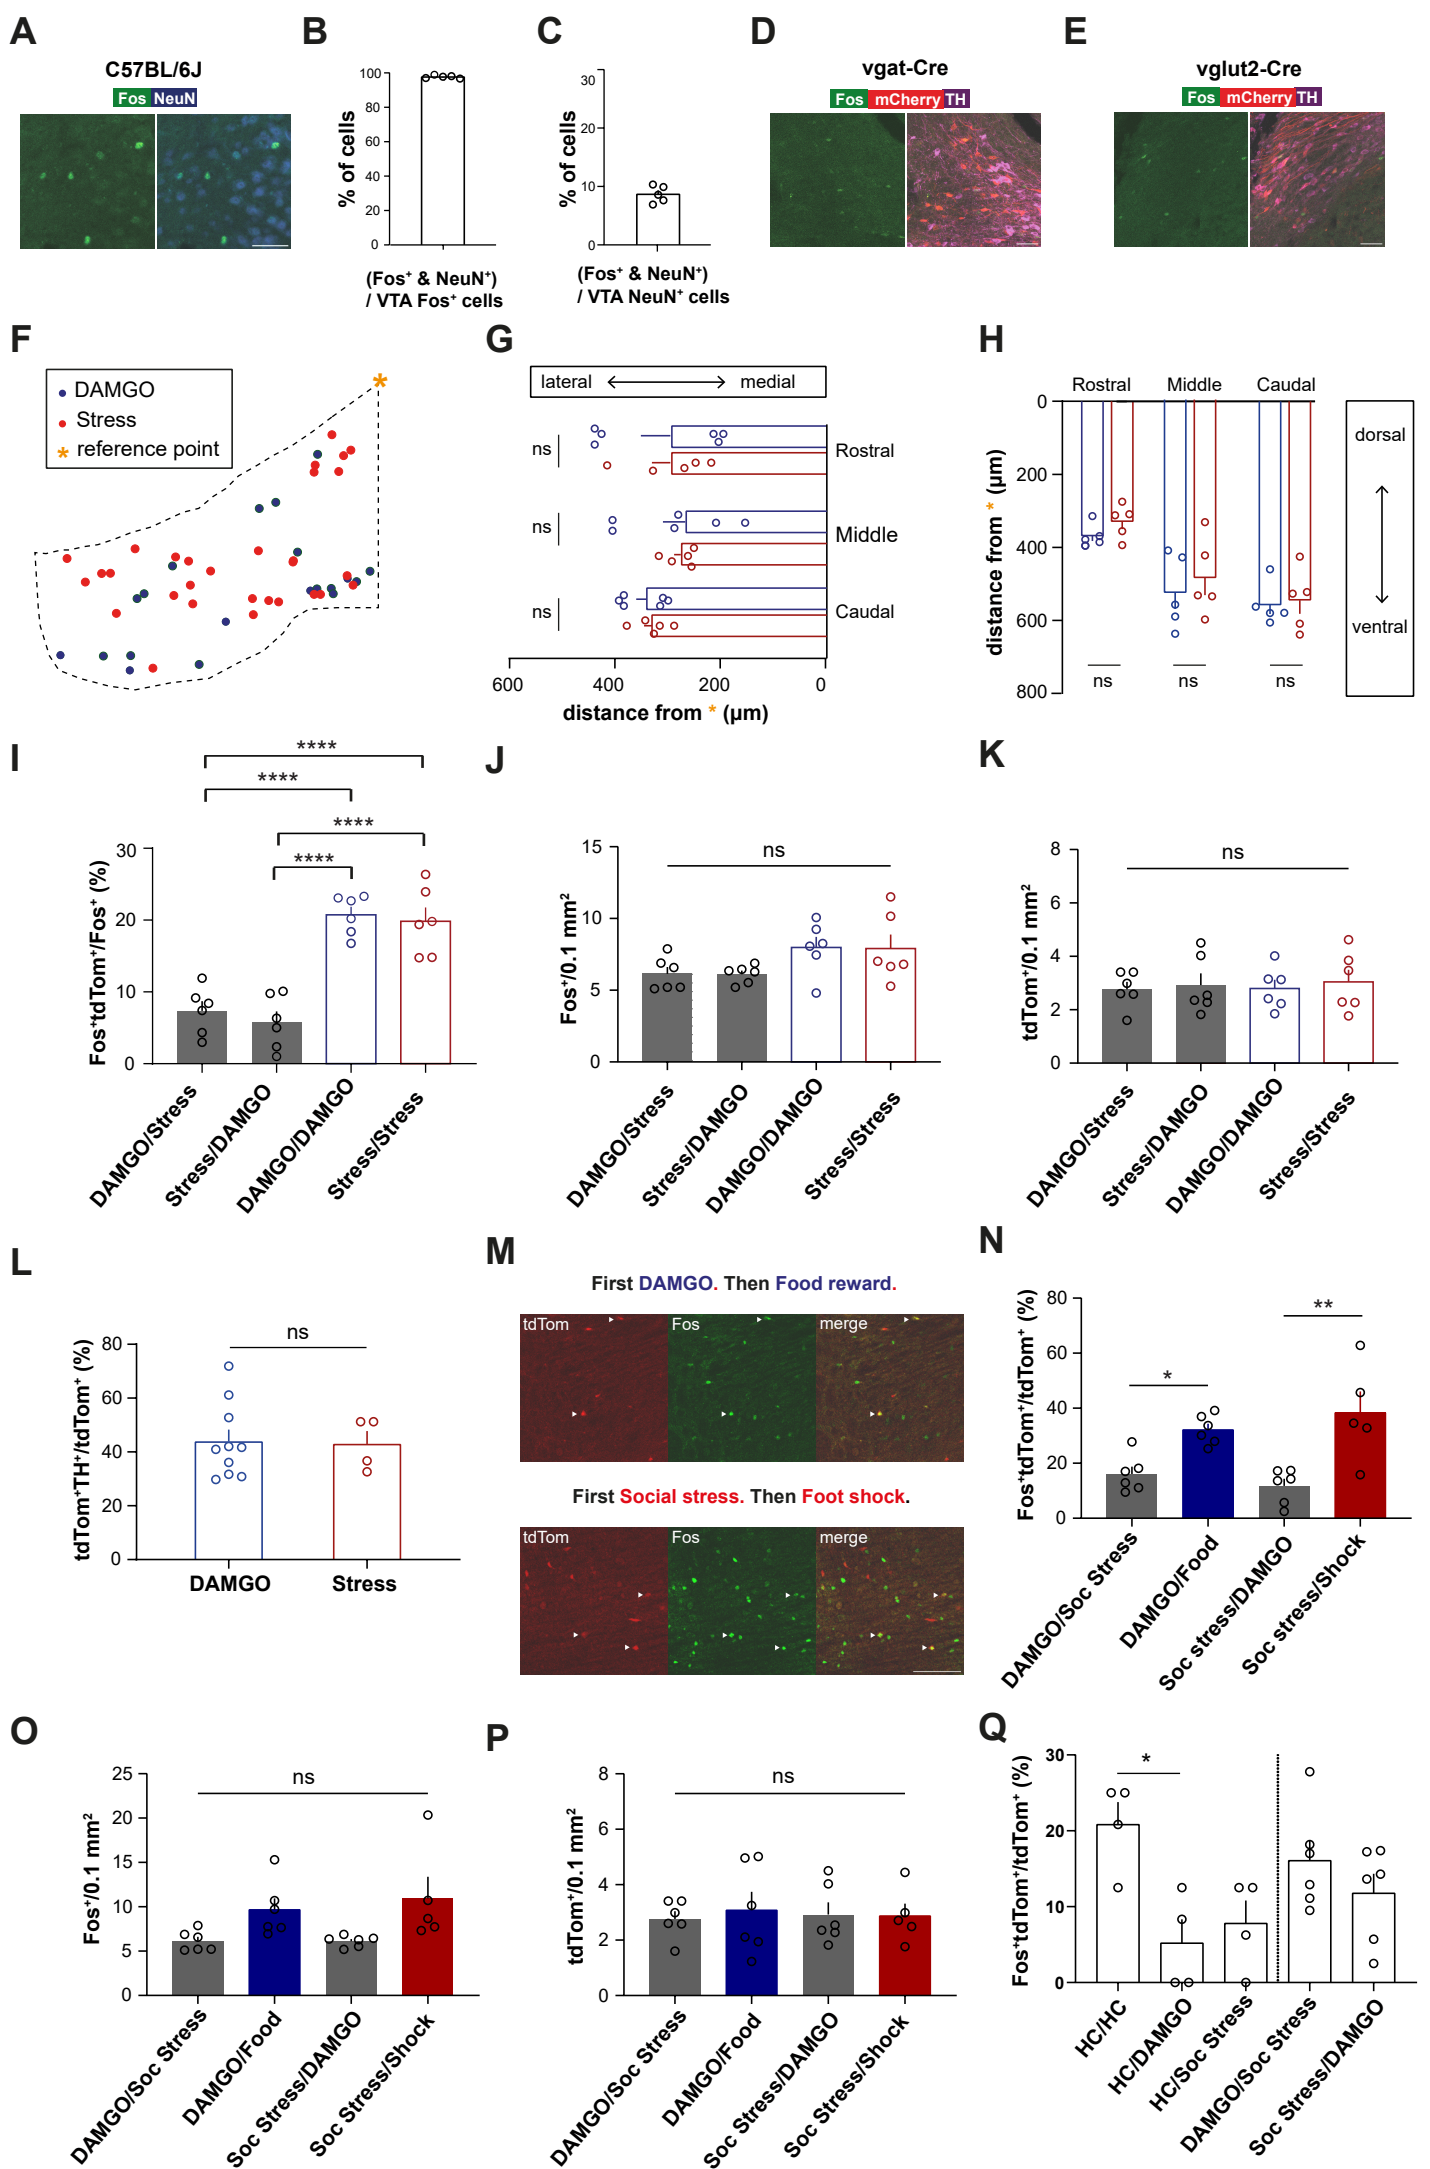

Supplementary Figure 2

**SUPPLEMENTARY FIGURE 2 | Valence stimuli recruit distinct VTA ensembles. (A)**

Representative example of Fos/NeuN co-staining in the VTA. Scale bar: 50 $\mu$ m. **(B)** Percentage Fos<sup>+</sup>NeuN<sup>+</sup>/Fos<sup>+</sup> (N=5 mice). **(C)** Percentage Fos<sup>+</sup>NeuN<sup>+</sup>/NeuN<sup>+</sup> (N=5 mice). **(D)** Representative example of Fos-mCherry-TH colabeling in the VTA for VGAT<sup>+</sup> cells. Scale bar: 50 $\mu$ m. **(E)** As (D) but for Vglut2<sup>+</sup> cells. **(F)** Representative examples of topography of Fos<sup>+</sup> cells in the VTA after DAMGO (blue) or social stress (red). **(G)** Mediolateral distance of Fos<sup>+</sup> neurons in the VTA from reference point after DAMGO or stress (N=5/group, unpaired t-test, rostral: t(8)=0.00172, p=0.9987, middle: t(8)=0.1902, p=0.8539, caudal: t(8)=0.3951, p=0.7031). **(H)** As (G) but dorsoventral distances (N=5/group, unpaired t-test, rostral: t(8)=1.57, p=0.1550, middle: t(8)=0.6194, p=0.5529, caudal: t(8)=0.2889, p=0.78). **(I)** Percentage tdTom<sup>+</sup> and Fos<sup>+</sup>/Fos<sup>+</sup> cells (N=6/group, One-way ANOVA, F(3,20)=28, p<0.0001, Tukey's post-hoc comparisons: DAMGO/stress vs DAMGO/DAMGO, q(20)=8.885, p<0.0001, DAMGO/stress vs stress/stress, q(20)=8.294, p<0.0001, stress/DAMGO vs DAMGO/DAMGO, q(20)=9.955, p<0.0001, stress/DAMGO vs stress/stress, q(20)=9.364, p<0.0001). **(J)** Average number of Fos<sup>+</sup>/0.1 mm<sup>2</sup> (N=6/group, One-way ANOVA, F(3,20)=2.462, p=0.0922). **(K)** Average number of tdTom<sup>+</sup>/0.1 mm<sup>2</sup> (N=6/group, One-way ANOVA, F(3,20)=0.1122, p=0.9519). **(L)** Percentage tdTom<sup>+</sup>TH<sup>+</sup>/tdTom<sup>+</sup> for VTA<sub>DAMGO</sub> and VTA<sub>STRESS</sub> (N<sub>DAMGO</sub>=10, N<sub>STRESS</sub>=4, unpaired t test, t(12)=0.1231, p=0.9041). **(M)** Representative images of VTA slices from TRAP2xAi14 animals expressing tdTomato in DAMGO- or stress-activated neurons (TRAP) and Fos in food reward- or foot shock stress-activated neurons during a second exposure. White arrowheads: co-localized tdTomato (TRAP) and Fos. Scale bar: 50 $\mu$ m. **(N)** Percentage tdTom<sup>+</sup> and Fos<sup>+</sup>/tdTom<sup>+</sup> cells (N<sub>D/S</sub>=6, N<sub>D/FR</sub>=6, N<sub>S/D</sub>=6, N<sub>S/FS</sub>=5, One-way ANOVA, F(3,19)=9.471, p=0.0004, Tukey's post-hoc comparisons: DAMGO/social (soc) stress vs DAMGO/food reward, q(19)=4.097, p=0.0421, stress/DAMGO vs stress/foot shock, q(19)=6.439, p=0.0011). **(O)** Number of Fos<sup>+</sup>/0.1 mm<sup>2</sup> (N<sub>D/S</sub>=6, N<sub>D/FR</sub>=6, N<sub>S/D</sub>=6, N<sub>S/FS</sub>=5, One-way ANOVA, F(3,19)=3.739, p=0.0288). Tukey's post-hoc comparisons: No significant comparisons. **(P)** Number of tdTom<sup>+</sup>/0.1 mm<sup>2</sup> (N<sub>D/S</sub>=6, N<sub>D/FR</sub>=6, N<sub>S/D</sub>=6, N<sub>S/FS</sub>=5, One-way ANOVA, F(3,19)=0.07999, p=0.9701). **(Q)** Percentage tdTom<sup>+</sup> and Fos<sup>+</sup>/tdTom<sup>+</sup> cells (N<sub>HC/HC</sub>=4, N<sub>HC/D</sub>=4, N<sub>HC/S</sub>=4, N<sub>D/S</sub>=6, N<sub>S/D</sub>=6, One-way ANOVA, F(4,19)=4.209, p=0.0132, Tukey's post-hoc comparisons: HC/HC vs HC/DAMGO, q(19)=4.998, p=0.0167). Last two conditions reshown from Fig. 2H for ease of comparison. Data are presented as mean values + SEM. All statistical tests were performed two-sided. Source data are provided as a Source Data file.

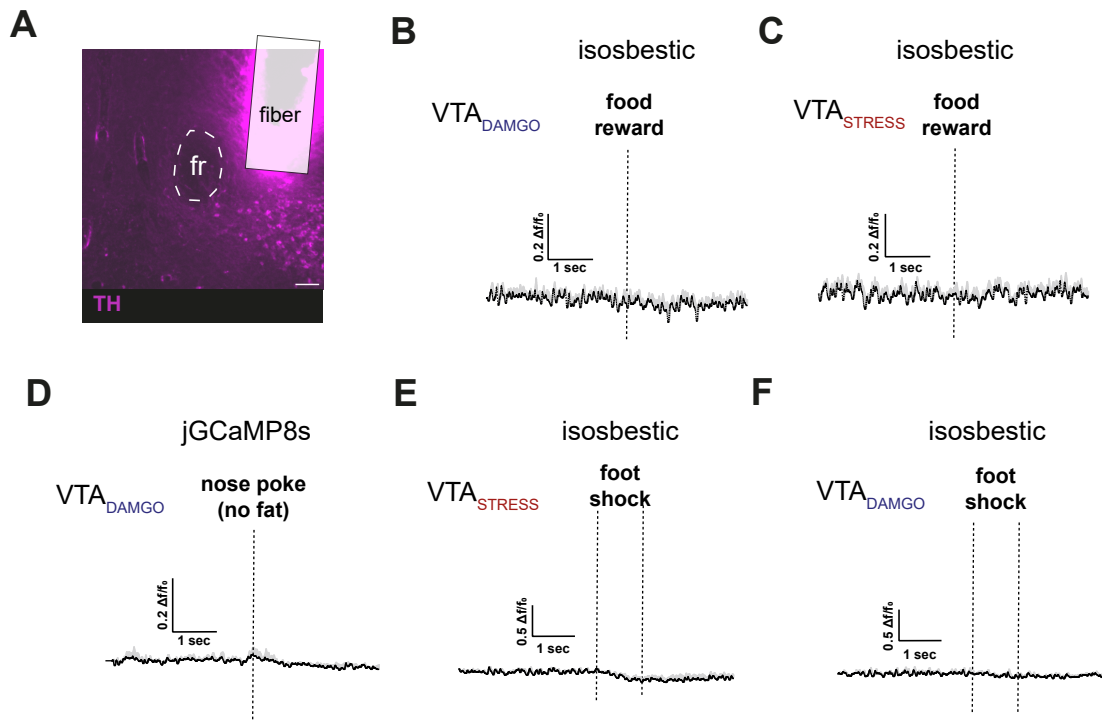

Supplementary Figure 3

**SUPPLEMENTARY FIGURE 3 | Control parameters for VTA<sub>DAMGO</sub> and VTA<sub>STRESS</sub> ensemble in vivo responses.** **(A)** Immunohistochemistry against TH and fiber trace over the VTA. Scale bar 100 $\mu$ m. fr fasciculus retroflexus **(B)** Line plot showing the average  $\Delta f/F_0$  of isosbestic control for VTA<sub>DAMGO</sub> ensemble during food reward. **(C)** Line plot showing the average  $\Delta f/F_0$  of isosbestic control for VTA<sub>STRESS</sub> ensemble during food reward. **(D)** Line plot showing the average  $\Delta f/F_0$  jRCaMP8s signal from VTA<sub>DAMGO</sub> time-locked to nose-poking in an empty port. **(E)** Line plot showing the average  $\Delta f/F_0$  of isosbestic control for VTA<sub>STRESS</sub> ensemble during foot shock. **(F)** Line plot showing the average  $\Delta f/F_0$  of isosbestic control for VTA<sub>DAMGO</sub> ensemble during foot shock. Data are presented as mean values + SEM. All statistical tests were performed two-sided. Source data are provided as a Source Data file.

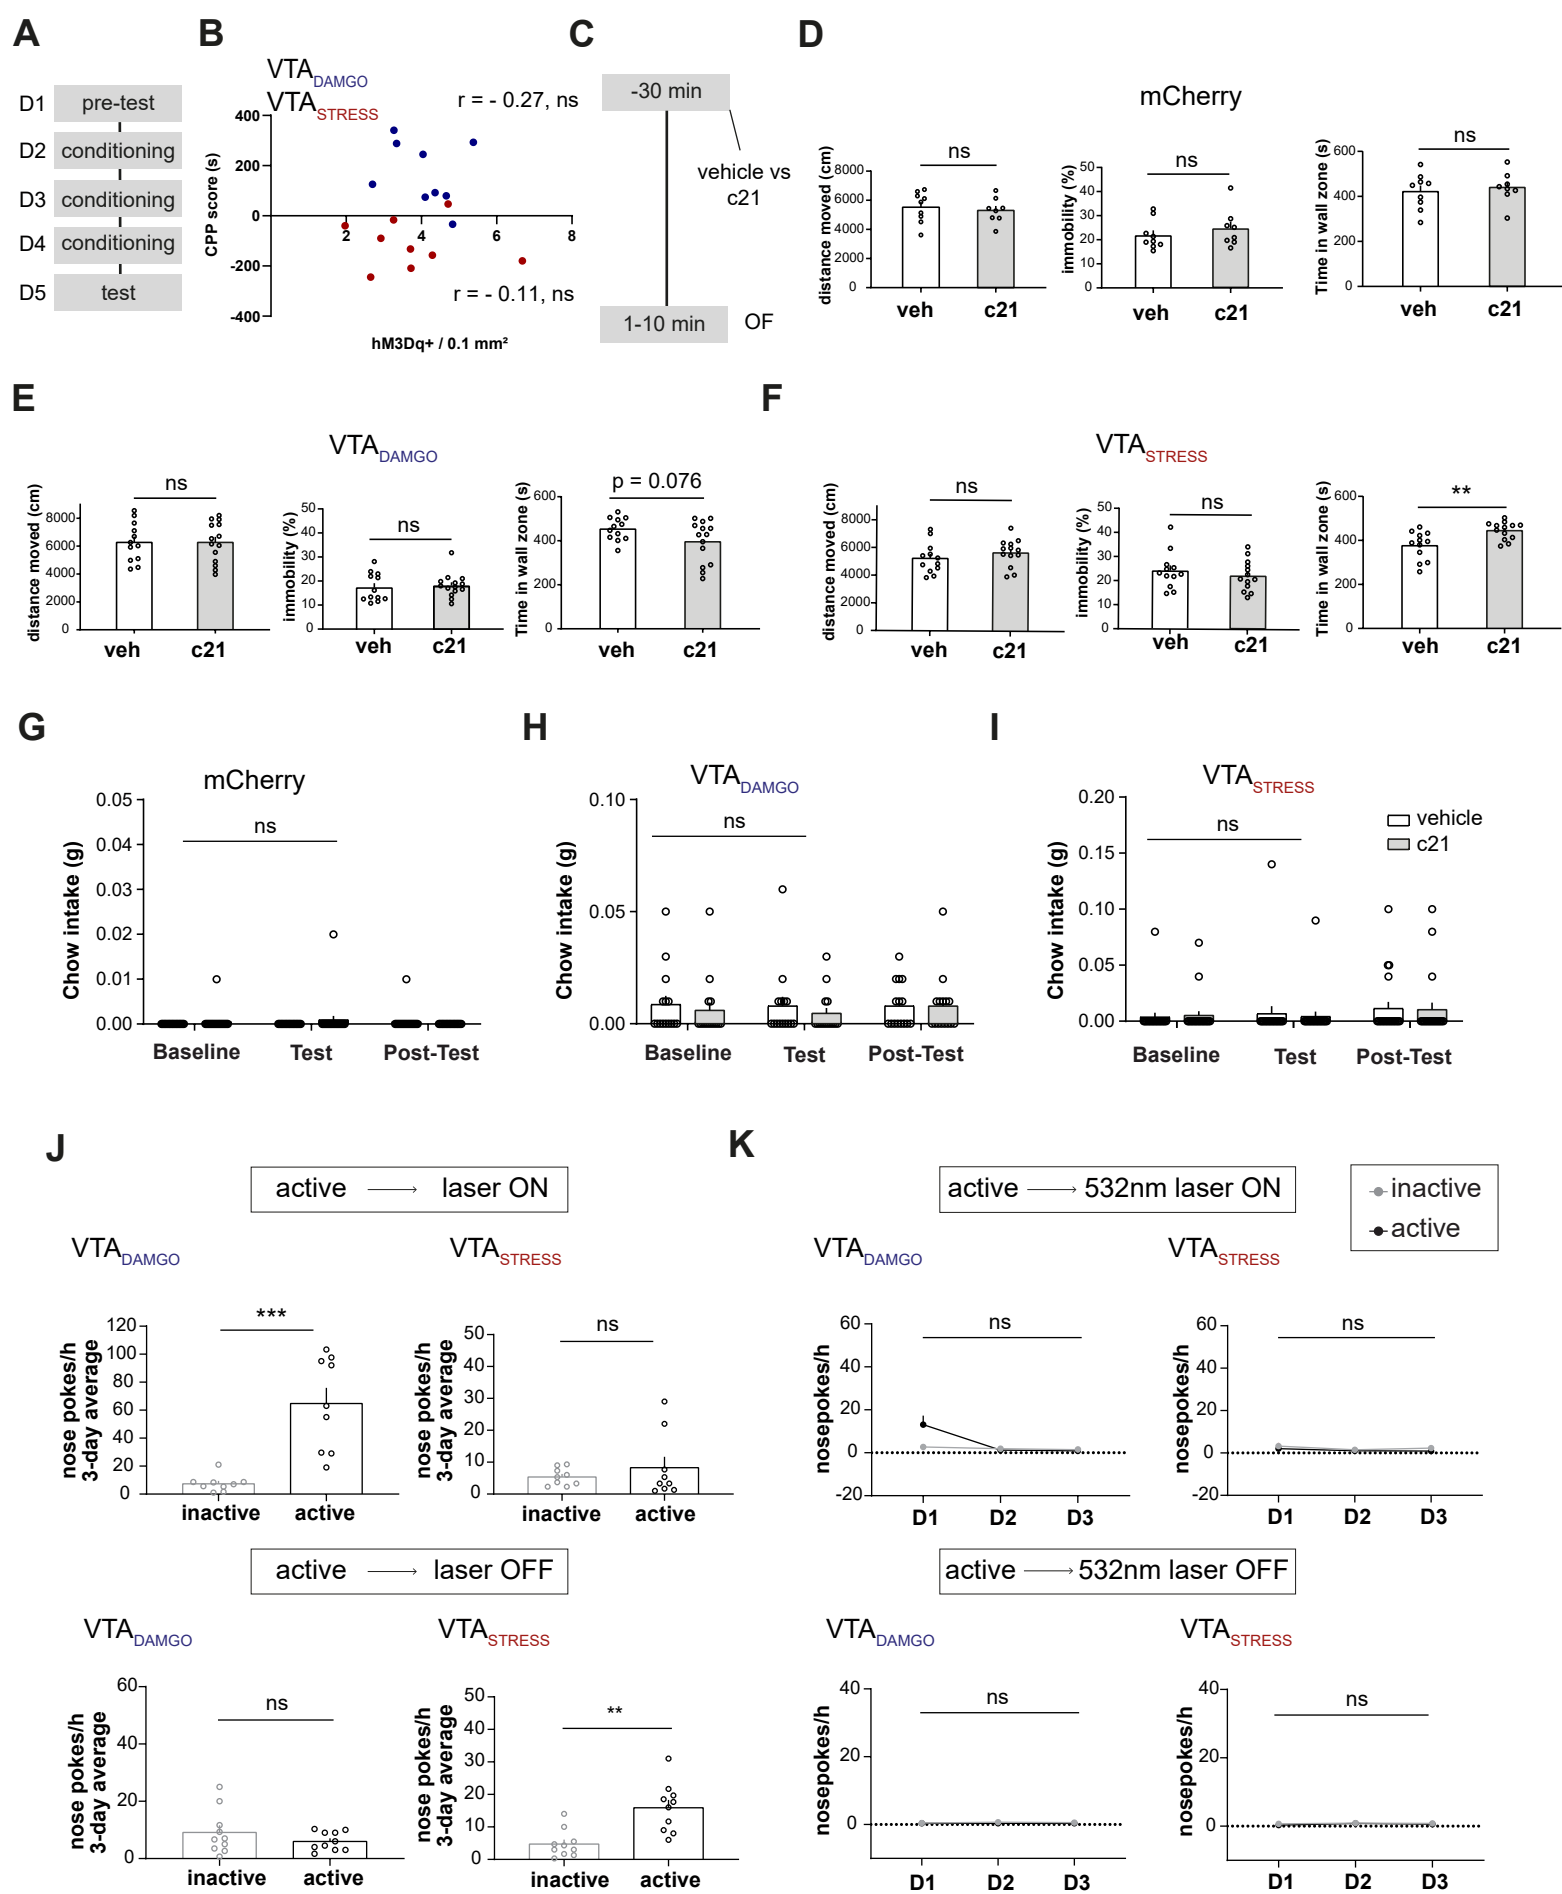

Supplementary Figure 4

**SUPPLEMENTARY FIGURE 4 | Control measures for stimulation of VTA<sub>DAMGO</sub> or VTA<sub>STRESS</sub> ensembles. (A)** 5-day CPP experimental timeline. **(B)** Correlation between ensemble size (number of hM3Dq-expressing neurons) and CPP score for VTA<sub>DAMGO</sub> and VTA<sub>STRESS</sub> groups (N<sub>DAMGO</sub>=9, Pearson's  $r=-0.2728$ ,  $p=0.4776$ . N<sub>STRESS</sub>=9, Pearson's  $r=0.1086$ ,  $p=0.7809$ ). **(C)** Open Field experimental timeline. **(D)** Distance moved (left), %immobility (middle) and time near wall (right) in the open field for mCherry mice, after vehicle or c21 in injection (N<sub>veh</sub>=9, N<sub>c21</sub>=8, distance: unpaired t test,  $t(15)=0.4842$ ,  $p=0.6352$ , immobility: unpaired t test,  $t(15)=0.8293$ ,  $p=0.4199$ , wall zone: unpaired t test,  $t(15)=0.4876$ ,  $p=0.6329$ ). **(E)** As (D), but for the VTA<sub>DAMGO</sub> group (N<sub>veh</sub>=12, N<sub>c21</sub>=14, distance moved: unpaired t test,  $t(24)=0.0003532$ ,  $p=0.09997$ , immobility: unpaired t test,  $t(24)=0.3619$ ,  $p=0.7206$ , wall zone: unpaired t test,  $t(24)=1.854$ ,  $p=0.0761$ ). **(F)** As (D), but for the VTA<sub>STRESS</sub> group (N<sub>veh</sub>=12, N<sub>c21</sub>=13, distance: unpaired t test,  $t(23)=1.021$ ,  $p=0.3181$ , immobility: unpaired t test,  $t(23)=0.6430$ ,  $p=0.5266$ , wall zone: unpaired t test,  $t(23)=3.206$ ,  $p=0.0039$ ). **(G)** Chow intake during baseline, test, and post-test days for mCherry group (N=22, Two-way RM ANOVA, Day x Ligand interaction,  $F(2,84)=0.2749$ ,  $p=0.7603$ ). **(H)** As (G), but for VTA<sub>DAMGO</sub> group (N=15, Two-way RM ANOVA, Day x Ligand interaction,  $F(2,56)=0.1318$ ,  $p=0.8768$ ). **(I)** As (G), but for VTA<sub>STRESS</sub> group (N=21, Two-way RM ANOVA, Day x Ligand interaction,  $F(2,80)=0.1651$ ,  $p=0.8481$ ). **(J)** Top: Number (3d average) of nose-pokes to activate a 473nm laser for VTA<sub>DAMGO</sub> and VTA<sub>STRESS</sub> groups (VTA<sub>DAMGO</sub>: N=9, paired t test,  $t(8)=5.622$ ,  $p=0.0005$ . VTA<sub>STRESS</sub>: N=10, paired t test,  $t(9)=1.446$ ,  $p=0.1821$ ). Bottom: As top, but to deactivate the 473nm laser (VTA<sub>DAMGO</sub>: N=9, paired t test,  $t(8)=0.8623$ ,  $p=0.4136$ . VTA<sub>STRESS</sub>: N=10, paired t test,  $t(9)=4.104$ ,  $p=0.0027$ ). **(K)** Top: Number of nose pokes to activate a 532 nm laser for VTA<sub>DAMGO</sub> and VTA<sub>STRESS</sub> on D1-D3 (N<sub>DAMGO</sub>=9, Two-way RM ANOVA, Day x Nose-poke interaction,  $F(2,32)=6.434$ ,  $p=0.0045$ , no significant post-hoc. N<sub>STRESS</sub>=10, Two-way RM ANOVA, Day x Nose-poke interaction,  $F(2,36)=0.2363$ ,  $p=0.7908$ ). Bottom: As top, but to deactivate a 532 nm laser (N<sub>DAMGO</sub>=9, Two-way RM ANOVA, Day x Nose-poke interaction,  $F(2,32)=0.1231$ ,  $p=0.8846$ . N<sub>STRESS</sub>=10, Two-way RM ANOVA,  $F(2,36)=0.1667$ ,  $p=0.8471$ ). Data are presented as mean values + SEM. All statistical tests were performed two-sided. Source data are provided as a Source Data file.

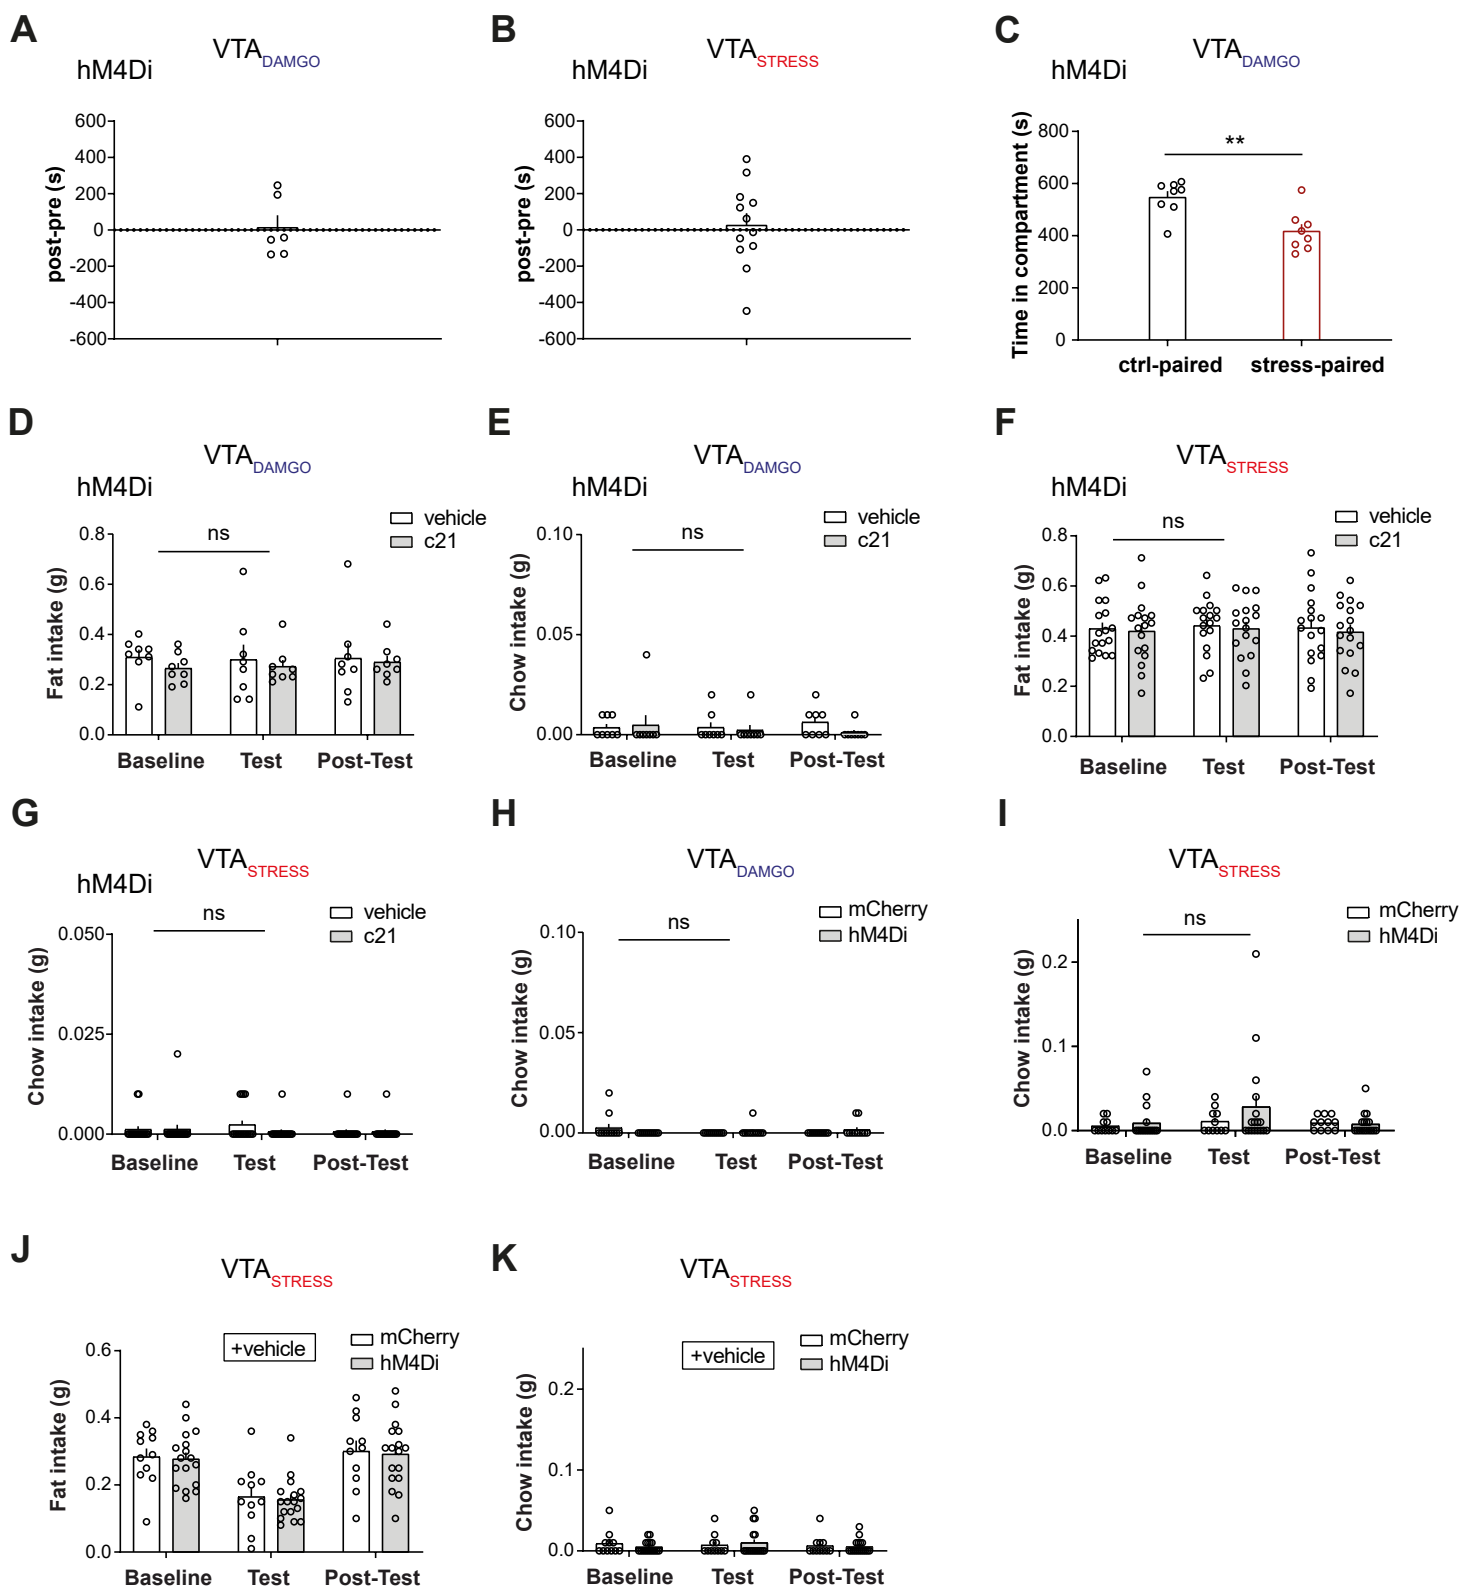

Supplementary Figure 5

**SUPPLEMENTARY FIGURE 5 | Control measures for inhibition of VTA<sub>DAMGO</sub> or VTA<sub>STRESS</sub>**

**ensembles. (A)** Preference score for VTA<sub>DAMGO</sub> hM4Di-expressing mice (N=6, paired t test,  $t(5)=0.1963$ ,  $p=0.8521$ ). **(B)** Preference score for VTA<sub>STRESS</sub> hM4Di-expressing mice (N=12, paired t test,  $t(11)=0.3854$ ,  $p=0.7073$ ). **(C)** Time spent in control-paired or stress-paired compartments in VTA<sub>DAMGO</sub> hM4Di-expressing animals (N=8, paired t test,  $t(14)=3.599$ ,  $p=0.0029$ ). **(D)** Amount of fat consumed for VTA<sub>DAMGO</sub> hM4Di-expressing animals during baseline, test, and post-test days. (N=8, Two-way RM ANOVA, Day x Ligand interaction,  $F(2,28)=0.1662$ ,  $p=0.8477$ ). **(E)** As (D) but for chow consumed (N=8, Two-way RM ANOVA, Day x Ligand interaction,  $F(2,28)=0.6488$ ,  $p=0.5304$ ). **(F)** Fat consumed for VTA<sub>STRESS</sub> hM4Di-expressing animals during baseline, test, and post-test days (N=17, Two-way RM ANOVA, Day x Group interaction,  $F(2,64)=0.008964$ ,  $p=0.9911$ ). **(G)** As (F) but for chow consumed (N=17, Two-way RM ANOVA, Day x Group interaction,  $F(2,64)=0.8889$ ,  $p=0.4161$ ). **(H)** Chow consumed during baseline, test, and post-test day for VTA<sub>DAMGO</sub> mCherry- or hM4Di-expressing mice. During test day mice received an injection of c21 (2 mg/kg) followed by an injection of DAMGO (1 mg/kg) before the beginning of the feeding session ( $N_{\text{mCherry}}=11$ ,  $N_{\text{hM4Di}}=11$ , Day x Group interaction, Two-way RM ANOVA,  $F(2,40)=3.231$ ,  $p=0.05$ ). **(I)** Chow consumed during baseline, test, and post-test day for VTA<sub>STRESS</sub> mCherry- or hM4Di-expressing mice. During test day mice received an injection of c21 (2 mg/kg) followed by a 20 sec episode of social stress before the beginning of the feeding session ( $N_{\text{mCherry}}=11$ ,  $N_{\text{hM4Di}}=17$ , Two-way RM ANOVA, Day x Group interaction,  $F(2,52)=0.9741$ ,  $p=0.3843$ ). **(J)** Fat consumed during baseline, test, and post-test days for VTA<sub>STRESS</sub> mCherry- and hM4Di-expressing mice. During test day mice received a vehicle injection followed by a 20 s episode of social stress prior to the beginning of the feeding session ( $N_{\text{mCherry}}=11$ ,  $N_{\text{hM4Di}}=17$ , Two-way RM ANOVA, Day main effect,  $F(1.818,47.27)=36.35$ ,  $p<0.0001$ ). **(K)** As (J), but for chow intake ( $N_{\text{mCherry}}=11$ ,  $N_{\text{hM4Di}}=17$ , Two-way RM ANOVA, Day x Group interaction,  $F(2,52)=0.5835$ ,  $p=0.5615$ ). Data are presented as mean values + SEM. All statistical tests were performed two-sided. Source data are provided as a Source Data file.



**A**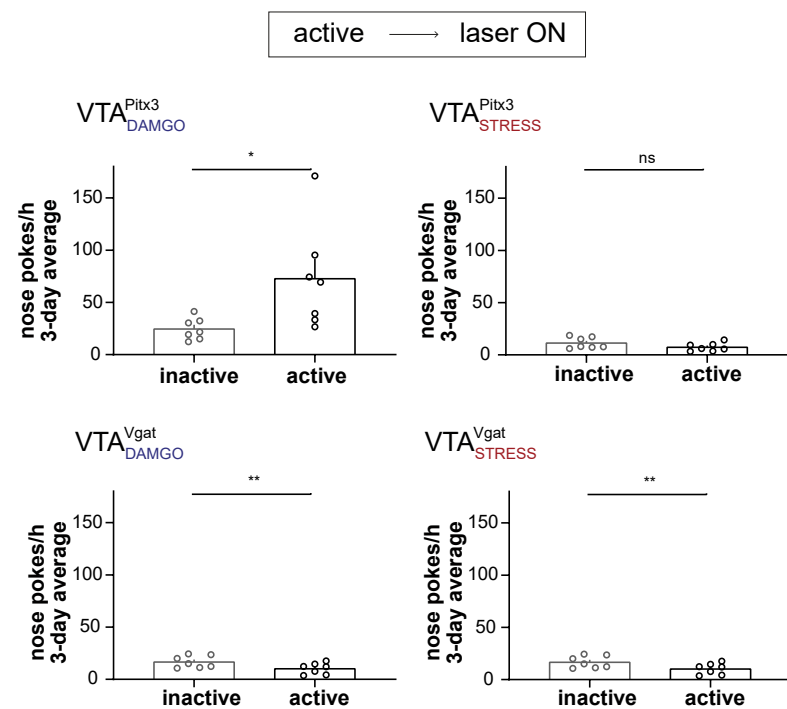**B**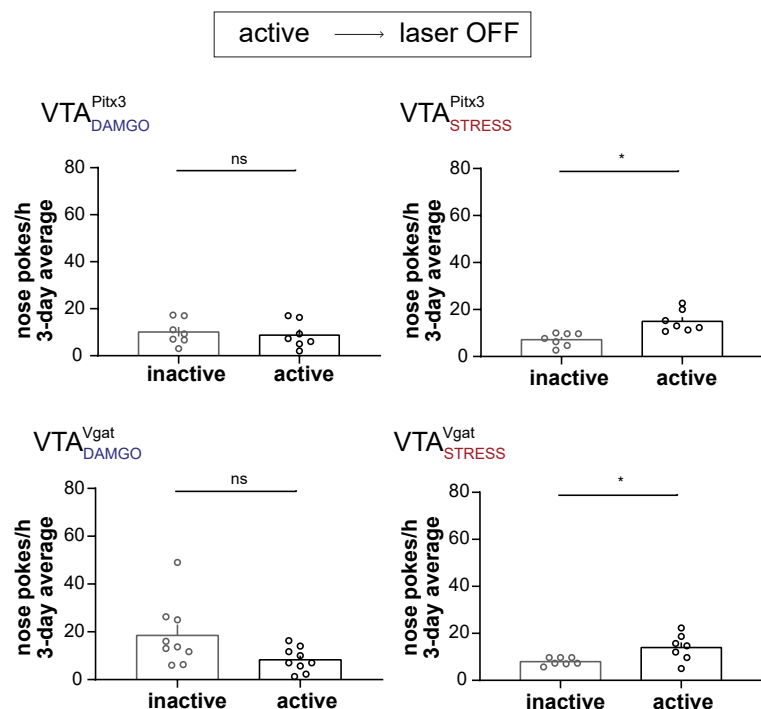

Supplementary Figure 6

**SUPPLEMENTARY FIGURE 6 | Control measures for intersectional manipulation of neurotransmitter-defined subsets of VTA<sub>DAMGO</sub> or VTA<sub>STRESS</sub> ensembles. (A)** Top: The 3-day average number of nose-pokes to activate a 473nm laser for activation of the dopaminergic part of VTA<sub>DAMGO</sub> and VTA<sub>STRESS</sub> groups (VTA<sub>DAMGO</sub> : N=7, paired t test,  $t(6)=2.707$ ,  $p=0.0352$ . VTA<sub>STRESS</sub>: N=7, paired t test,  $t(6)=2.049$ ,  $p=0.0864$ ). Bottom: The 3-day average number of nose-pokes to activate a 473nm laser for the GABAergic part of VTA<sub>DAMGO</sub> and VTA<sub>STRESS</sub> groups (VTA<sub>DAMGO</sub> : N=9, paired t test,  $t(8)=4.412$ ,  $p=0.0022$ . VTA<sub>STRESS</sub>: N=7, paired t test,  $t(6)=5.728$ ,  $p=0.0012$ ). **(B)** Top: The 3-day average number of nose-pokes to deactivate a 473nm laser for the dopaminergic part of VTA<sub>DAMGO</sub> and VTA<sub>STRESS</sub> groups (VTA<sub>DAMGO</sub> : N=7, paired t test,  $t(6)=0.6896$ ,  $p=0.5162$ . VTA<sub>STRESS</sub>: N=7, paired t test,  $t(6)=3.196$ ,  $p=0.0187$ ). Bottom: The 3-day average number of nose-pokes to deactivate a 473nm laser for the GABAergic part of VTA<sub>DAMGO</sub> and VTA<sub>STRESS</sub> ensembles (VTA<sub>DAMGO</sub> : N=9, paired t test,  $t(8) = 1.995$ ,  $p=0.0811$ . VTA<sub>STRESS</sub>: N=7, paired t test,  $t(6)=3.045$ ,  $p=0.0227$ ). Data are presented as mean values + SEM. All statistical tests were performed two-sided. Source data are provided as a Source Data file.
